# Supplementary material for: Pathway analysis from lists of microRNAs: common pitfalls and alternative strategy
Source: PubMed Central journal article supplement (PMC4402548; doi:10.1093/nar/gkv249), 2015-03-23
Supplement: supp_gkv249_nar-03642-n-2014-File008.pdf [file supp_gkv249_nar-03642-n-2014-File008.pdf]

## Supplementary figures and supplementary table legends

---

### Pathway analysis from lists of microRNAs : common pitfalls and alternative strategy

---

*Patrice Godard and Jonathan van Eyll*

#### **Supplementary information**

##### ***The microRNA knowledge is biased for cancer biology***

Many pathways identified by the strategy 1 are related to cancer which indicates a knowledge bias in this field for microRNA compared to protein coding genes.

To test this hypothesis, the relative representations of miRNA genes and protein coding genes in cancer-related scientific literature were compared using the SCALview test mining tool(1). This tool allows a quantitative analysis of ontology-mapped terms co-occurrence in the entire collection of Pubmed abstracts and extracted all Mesh diseases co-cited with either a miRNA or a protein coding genes.

Using an hypergeometric test, 1093 Mesh diseases were identified as significantly enriched with miRNA and 3320 with protein coding genes. Among them 17.5% (163) and 8.5% (259) respectively are neoplastic diseases. The difference between the proportions of neoplastic diseases associated to miRNA and protein coding genes is highly significant according to a Fisher test ( $p\text{-value} < 10^{-10}$ ). This result shows a significant bias in current the knowledge related to the role of miRNA in diseases towards neoplastic and cancer-related processes. As recently discussed by Mørk(2), this bias could be related to a study imbalance or to the underlying function of miRNA as such. Anyway it has to be taken into account when performing analyses using the current knowledge, such as pathways analyses.

## ***Method for literature analysis***

The list of Mesh diseases co-cited with either protein coding genes or miRNA genes was obtained using SCAlview Pharma 1.0 running on the collection of Pubmed abstracts mentioning a Mesh disease as available on 19 November 2013 (13,145,693 abstracts). Mesh diseases significantly co-cited (FDR < 0.001) with either a protein coding gene or a miRNA were obtained applying an hypergeometric test.

To differentiate neoplastic Mesh diseases from other Mesh diseases, the Mesh disease ontology(3) was downloaded from Mesh website ([http://www.nlm.nih.gov/mesh/2014/download/mtr\\_smp.txt](http://www.nlm.nih.gov/mesh/2014/download/mtr_smp.txt)) and all diseases falling under the node “C04 – Neoplasms” were classified as neoplastic compared to others.

## **Supplementary Figure 1**

Hierarchical clustering on the Jaccard index computed for each pathway couple at the level of protein coding gene. The average linkage method was used to build the tree. Cluster of pathways sharing on average at least 20% of Entrez gene ID according to the KEGG.db(4) package are highlighted.

# 1-Jaccard

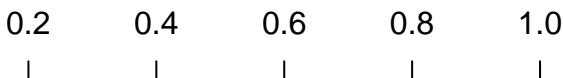

## KEGG Pathways - Entrez genes IDs

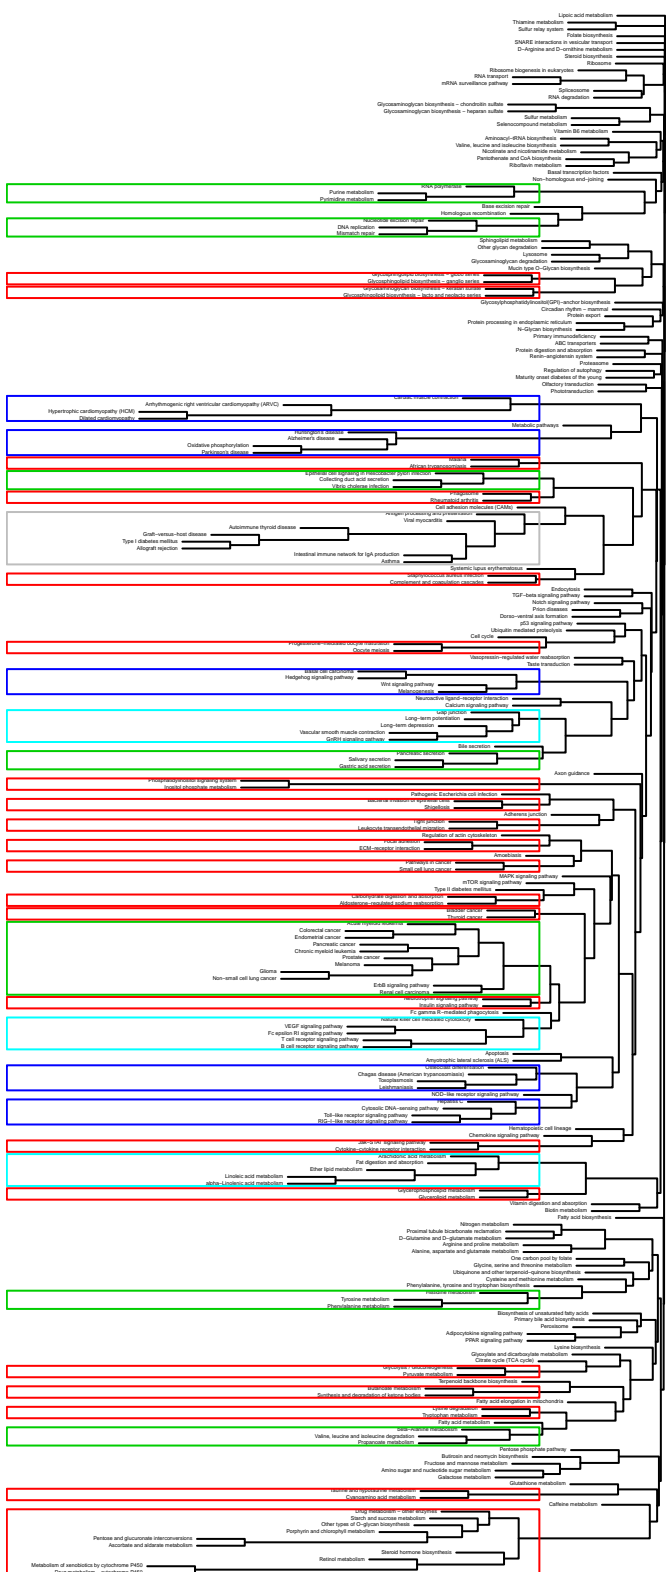

Average linkage

## **Supplementary Figure 2**

Hierarchical clustering on the Jaccard index computed for each pathway couple at the level of microRNA. The average linkage method was used to build the tree. Cluster of pathways sharing on average at least 20% of associated miRNAs using mirTarBase(5) information are highlighted.

1-Jaccard

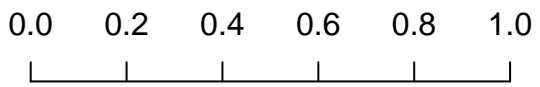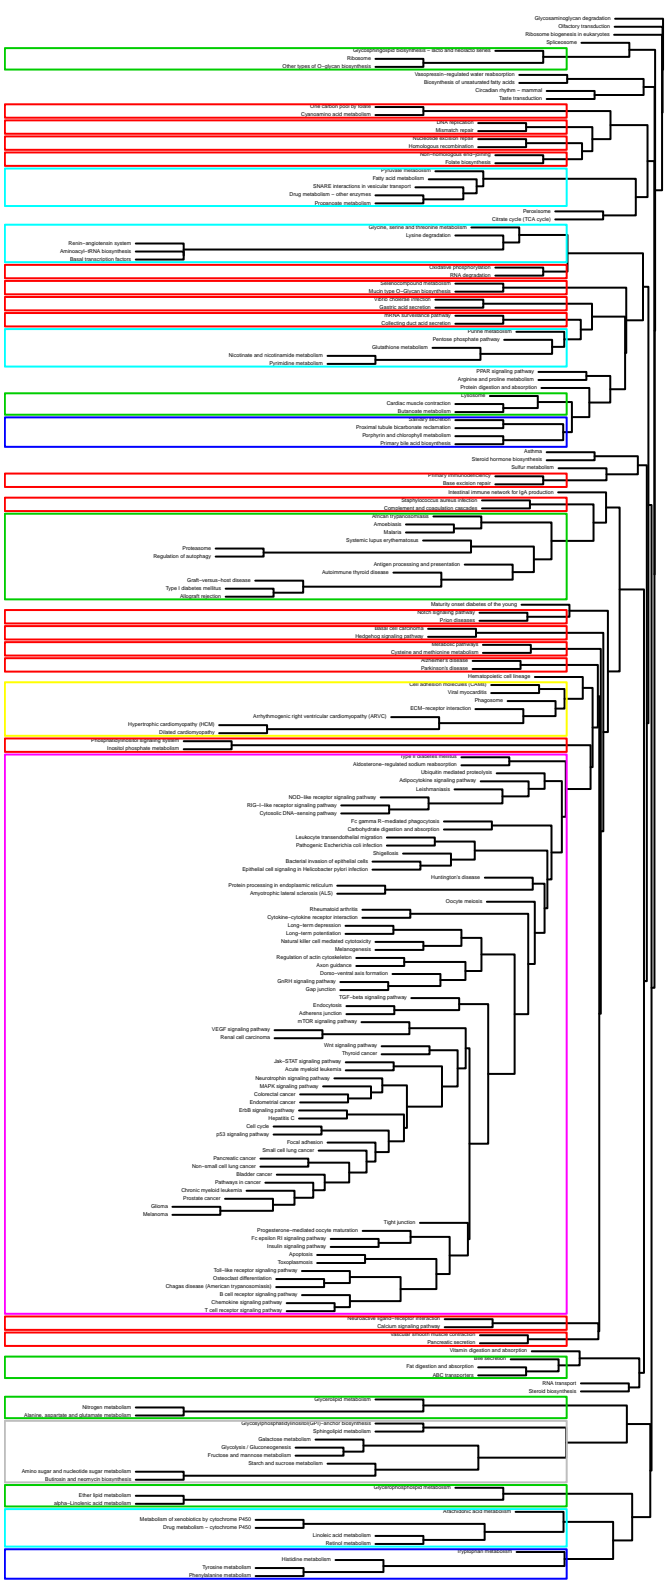

Average linkage

KEGG Pathways - microRNA

## Supplementary table legends

### Supplementary Table 1

Data associated to the miRNA signature of Alzheimer's disease (AD-up and AD-down) defined by Satoh 2012(6). Significance (FDR<0.05) is highlighted by red color in cells. Data are structured across different sheets as follows :

**Original microRNA:** miRNAs as provided in the original publication and their mapping in mirTarBase(5).

**mirTarBase Targets:** Entrez ID of genes targeted by AD-up and AD-down miRNAs according to mirTarBase.

**AD-up S1 Pathways:** Enrichment analysis results when applying strategy 1 on AD-up miRNAs. The first 3 columns are related to the significance of association with the original signature. The remaining columns show the distribution of the FDR for each pathway when applying the strategy 1 to 1000 random selections of 16 miRNAs.

**AD-down S1 Pathways:** Enrichment analysis results when applying strategy 1 on AD-down miRNAs. The first 3 columns are related to the significance of association with the original signature. The remaining columns show the distribution of the FDR for each pathway when applying the strategy 1 to 1000 random selections of 99 miRNAs.

**AD-up S2 Pathways:** Enrichment analysis results when applying strategy 2 on AD-up miRNAs. The first 3 columns are related to the significance of association with the original signature. The remaining columns show the distribution of the FDR for each pathway when applying the strategy 2 to 1000 random selections of 16 miRNAs.

**AD-down S2 Pathways:** Enrichment analysis results when applying strategy 2 on AD-down miRNAs. The first 3 columns are related to the significance of association with the original signature. The remaining columns show the distribution of the FDR for each pathway when applying the strategy 2 to 1000 random selections of 99 miRNAs.

**AD-down S3 Pathways:** Enrichment analysis results when applying strategy 3 on AD-down miRNAs. The first 3 columns are related to the significance of association with the original signature. The last 3 columns indicates to which cluster of Supplementary Figure 2 each pathway belongs, the number of significant pathways (FDR < 0.05) compared to the total number of pathways in the corresponding cluster. The remaining columns show the distribution of the FDR for each pathway when applying the strategy 3 to 1000 random selections of 99 miRNAs.

## Supplementary Table 2

**All mirTarBase Targets S1 KEGG:** KEGG pathways enriched in all protein coding genes targeted by at least one miRNA according to mirTarBase. The first 3 columns show the significance of the association. The remaining columns indicate pathways identified in different studies(6–9) focused on different topics.

**Top-Targeted S2 KEGG:** KEGG pathways enriched in genes targeted by at least one miRNA, in the top 1000, 500, 100 and 50 genes targeted by miRNAs according to mirTarBase. Only FDR is shown.

## Supplementary Table 3

Data associated to the miRNA signature of Chordomas defined by Long *et al.* 2013(7). Significance (FDR<0.05) is highlighted by red color in cells. Data are structured across different sheets as follows :

**Original microRNA:** miRNAs as provided in the original publication and their mapping in mirTarBase(5).

**Chordoma-up S3 Pathways:** Enrichment analysis results when applying strategy 3 on Chordoma-up miRNAs. The first 3 columns are related to the significance of association with the original signature. The last 3 columns indicates to which cluster of Supplementary Figure 2 each pathway belongs, the number of significant pathways (FDR < 0.05) compared to the total number of pathways in the corresponding cluster. The remaining columns show the distribution of the FDR for each pathway when applying the strategy 3 to 1000 random selections of 19 miRNAs.

## References

1. Fluck, J. (2007) ProMiner: Recognition of human gene and protein names using regularly updated dictionaries. In *Second BioCreative Challenge Evaluation Workshop 2007. Proceedings*.pp. 149–151.
2. Mørk, S., Pletscher-Frankild, S., Palleja Caro, A., Gorodkin, J. and Jensen, L.J. (2013) Protein-driven inference of miRNA-disease associations. *Bioinform. Oxf. Engl.*, 10.1093/bioinformatics/btt677.
3. Nelson, S.J., Schopen, M., Savage, A.G., Schulman, J.-L. and Arluk, N. (2004) The MeSH translation maintenance system: structure, interface design, and implementation. *Stud. Health Technol. Inform.*, **107**, 67–69.
4. Carlson, M. KEGG.db: A set of annotation maps for KEGG.
5. Hsu, S.-D., Tseng, Y.-T., Shrestha, S., Lin, Y.-L., Khaleel, A., Chou, C.-H., Chu, C.-F., Huang, H.-Y., Lin, C.-M., Ho, S.-Y., *et al.* (2014) miRTarBase update 2014: an information resource for experimentally validated miRNA-target interactions. *Nucleic Acids Res.*, **42**, D78–85.
6. Satoh, J. (2012) Molecular network of microRNA targets in Alzheimer's disease brains. *Exp. Neurol.*, **235**, 436–446.



7. Long,C., Jiang,L., Wei,F., Ma,C., Zhou,H., Yang,S., Liu,X. and Liu,Z. (2013) Integrated miRNA-mRNA analysis revealing the potential roles of miRNAs in chordomas. *PLoS One*, **8**, e66676.
8. Ziats,M.N. and Rennert,O.M. (2014) Identification of differentially expressed microRNAs across the developing human brain. *Mol. Psychiatry*, **19**, 848–852.
9. Stather,P.W., Sylvius,N., Wild,J.B., Choke,E., Sayers,R.D. and Bown,M.J. (2013) Differential microRNA expression profiles in peripheral arterial disease. *Circ. Cardiovasc. Genet.*, **6**, 490–497.
